# Supplementary material for: Seasonal and Day–Night Variations in Carbonaceous Aerosols and Their Light-Absorbing Properties in Guangzhou, China
Source: MDPI journal article supplement (doi:10.3390/atmos14101545), 2023-10-10
Supplement: s1 [file s1]

## Supplementary Information for

# Seasonal and day–night variations in carbonaceous aerosols and their light-absorbing properties in Guangzhou, China

Jiannan Su <sup>1,2</sup>, Runqi Zhang <sup>1,2</sup>, Bowen Liu<sup>3</sup>, Mengxue Tong<sup>1,2</sup>, Shaoxuan Xiao<sup>1,2</sup>, Xiaoyang Wang<sup>1</sup>, Qilong Zhao<sup>3</sup>, Wei Song<sup>1</sup>, Dilinuer Talifu<sup>3</sup> and Xinming Wang <sup>1,2,\*</sup>

## Table and Figure Captions

Table S1 The species included in the markers for each source.

Table S2 The nearest observation points for BLH of each station.

Table S3 Summary of meteorological parameters including temperature (T), relatively humidity (RH), wind speed (WS) and boundary layer height (BLH) and atmospheric pressure (P), and PM<sub>2.5</sub> and gaseous pollutants including SO<sub>2</sub>, NO<sub>2</sub>, O<sub>3</sub>, NO and NO<sub>x</sub> (NO + NO<sub>2</sub>).

Figure S1 Results of independent samples t-test for day/night average value comparisons of OC, EC and SOC concentrations,  $b_{\text{abs,BrC},405}$ ,  $b_{\text{abs,BC},405}$ ,  $\text{MAC}_{\text{BrC},405}$  and  $\text{MAC}_{\text{BC},635}$  at the four sites in autumn.

Figure S2 Results of independent samples t-test for day/night average value comparisons of OC, EC and SOC concentrations and  $b_{\text{abs,BrC},405}$ ,  $b_{\text{abs,BC},405}$ ,  $\text{MAC}_{\text{BrC},405}$  and  $\text{MAC}_{\text{BC},635}$  at the three sites in winter.

Figure S3 Results of the independent samples Mann-Whitney U test for diurnal data of the corresponding variables for (a) HG and (b) JL in autumn.

Figure S4 Results of the independent samples Mann-Whitney U test for the diurnal data of the corresponding variables for XH, SZ and HKUST in winter.

Figure S5 Results of the one-sided independent samples t-test or Mann-Whitney U test for the corresponding variables of JL and HG in autumn.

Figure S6 Pearson correlation coefficients of OC, EC, SOC concentrations,  $b_{\text{abs,BrC},405}$ , and  $b_{\text{abs,BC},405}$  with source tracers including BSOA, Ca<sup>2+</sup>, levoglucosan, fatty acids (FA), hopanes, steranes, HMW-PAHs, sterols and DHOPA, and gaseous pollutants including SO<sub>2</sub>, NO<sub>2</sub>, O<sub>3</sub>, NO and NO<sub>x</sub> and meteorological parameters including temperature (T), relatively humidity (RH), wind speed (WS), atmospheric pressure (P) and boundary layer height (BLH).

Figure S7 Pearson correlation coefficients between OC, EC,  $b_{\text{abs,BrC},405}$ ,  $b_{\text{abs,BC},405}$  and source marker using (a) daytime data and (b) nighttime data in winter, respectively.

**Figure S8.** Day-to-day variation of PM<sub>2.5</sub> carbonaceous aerosols concentration (μg/m<sup>3</sup>) and their light-absorbing properties (Mm<sup>−1</sup>), as well as meteorological factors during the observing period in autumn. Vector arrows indicate wind velocity and direction.

**Figure S9.** Day-to-day variation of PM<sub>2.5</sub> carbonaceous aerosols concentration (μg/m<sup>3</sup>) and their light-absorbing properties (Mm<sup>−1</sup>), as well as meteorological factors during the observing period in winter.

**Table S1.** The species included in the markers for sources.

| Markers          | Species                                                  |                                              |                                         | Sources          |
|------------------|----------------------------------------------------------|----------------------------------------------|-----------------------------------------|------------------|
| Ca <sup>2+</sup> | Ca <sup>2+</sup>                                         |                                              |                                         | dust             |
| LG               | levoglucosan                                             |                                              |                                         | biomass burning  |
| DHOPA            | 2,3-dihydroxy-4-oxopentanoic acid                        |                                              |                                         | ASOA             |
| BSOA             | 3-hydroxy-4,4-dimethylglutaric acid                      | 2-methylerythritol                           | pinic acid                              | BSOA             |
|                  | cis-2-methyl-1,3,4-trihydroxy-1-butene                   | b-caryophyllenic acid                        | 3-methylbutane-1,2,3-tricarboxylic acid |                  |
|                  | 3-methyl-2,3,4-trihydroxy-1-butene                       | 2-Methylglyceric acid                        | cis-pinonic acid                        |                  |
|                  | trans-2-methyl-1,3,4-trihydroxy-1-butene                 | 2-methylthreitol                             |                                         |                  |
| fatty acids      | trans-9-Octadecenoic acid<br>9,12-octadecanedienoic acid | hexadecanoic acid<br>cis-9-octadecenoic acid | octadecanoic acid                       | cooking          |
| sterols          | cholesterol<br>campesterol                               | stigmasterol<br>b-sitosterol                 |                                         |                  |
| hopanes          | 22,29,30-trisnorneohopane                                | 17 $\alpha$ (H),21 $\beta$ (H)-hopane        | 31(R)-hopane                            | vehicle emission |
|                  | 17 $\alpha$ (H)-22,29,30-trisnorhopane                   | 32(S)-hopane                                 | 31(S)-hopane                            |                  |
|                  | 17 $\alpha$ (H),21 $\beta$ (H)-30-norhopane              | 33(S)-hopane                                 | 32(R)-hopane                            |                  |
|                  | 18a(H)-29-norneohopane                                   | 33(R)-hopane                                 |                                         |                  |
| steranes         | 27aaa(S)-sterane                                         | 27abb(R)-sterane                             | 27abb(S)-sterane                        |                  |
|                  | 27aaa(R)-sterane                                         | 28aaa(S)-sterane                             | 28abb(R)-sterane                        |                  |
|                  | 28abb(S)-sterane                                         | 28aaa(R)-sterane                             | 29aaa(S)-sterane                        |                  |
|                  | 29abb(R)-sterane                                         | 29abb(S)-sterane                             | 29aaa(R)-sterane                        |                  |
| HMW-PAHs         | benzo(b)fluoranthene                                     | benzo(k)fluoranthene                         | perylene                                | coal combustion  |
|                  | benzo(j)fluoranthene                                     | benzo(e)pyrene                               | picene                                  |                  |
|                  | indeno(cd)fluoranthene                                   | indeno(cd)pyrene                             |                                         |                  |
|                  | dibenzo[a,h]anthracene                                   | benzo(a)pyrene                               |                                         |                  |

**Table S2.** The nearest observation points for boundary layer height (BLH) of each sampling site.

| Sampling site | Geographical location | Nearest point for BLH |
|---------------|-----------------------|-----------------------|
| HD            | 23.39 °N, 113.21 °E   | 23.50 °N, 113.25 °E   |
| JL            | 23.31 °N, 113.56 °E   | 23.25 °N, 113.50 °E   |
| SZ            | 23.13 °N, 113.26 °E   | 23.25 °N, 113.25 °E   |
| HG            | 22.82 °N, 113.49 °E   | 22.75 °N, 113.50 °E   |
| HKUST         | 22.75 °N, 113.61 °E   | 22.75 °N, 113.50 °E   |

**Table S3.** Summary of meteorological parameters including temperature (T), relative humidity (RH), wind speed (WS), boundary layer height (BLH), atmospheric pressure (P), and PM<sub>2.5</sub> and gaseous pollutants including SO<sub>2</sub>, NO<sub>2</sub>, O<sub>3</sub>, NO, and NO<sub>x</sub> (NO + NO<sub>2</sub>).

| Season                        | Sample site | diurnal time | T (°C)     | RH (%)     | WS (m/s)  | BLH (m)   | P (pa)   | PM <sub>2.5</sub> (µg/m <sup>3</sup> ) | SO <sub>2</sub> (µg/m <sup>3</sup> ) | NO <sub>2</sub> (µg/m <sup>3</sup> ) | O <sub>3</sub> (µg/m <sup>3</sup> ) | CO(mg/m <sup>3</sup> ) | NO(µg/m <sup>3</sup> ) | NO <sub>x</sub> (µg/m <sup>3</sup> ) |
|-------------------------------|-------------|--------------|------------|------------|-----------|-----------|----------|----------------------------------------|--------------------------------------|--------------------------------------|-------------------------------------|------------------------|------------------------|--------------------------------------|
| Autumn<br>(Mean±<br>95% C.I.) | XH          | day          | 32.8 ± 0.5 | 59.1 ± 1.7 | 1.1 ± 0.2 | 616 ± 20  | 1006 ± 2 | 37.8 ± 12.9                            | 6.0 ± 0.7                            | 22.9 ± 4                             | 147 ± 28                            | 0.7 ± 0.1              | 2.9 ± 0.4              | 27.2 ± 4.2                           |
|                               |             | night        | 30.5 ± 0.5 | 70.4 ± 1.7 | 0.9 ± 0.1 | 81 ± 39   | 1006 ± 1 | 48.9 ± 11.4                            | 6.1 ± 1.2                            | 47.3 ± 6.7                           | 66.7 ± 19.2                         | 0.9 ± 0.1              | 2.9 ± 1.1              | 51.8 ± 7.9                           |
|                               | JL          | day          | 31.4 ± 0.4 | 58.1 ± 1.9 | 1.2 ± 0.1 | 612 ± 25  | 1002 ± 2 | 50.7 ± 12.4                            | 5.0 ± 0.0                            | 32.1 ± 5.3                           | 117 ± 15                            | 0.7 ± 0.1              | 4.6 ± 1.3              | 39.0 ± 6.7                           |
|                               |             | night        | 27.6 ± 0.5 | 78.1 ± 0.9 | 0.9 ± 0.2 | 110 ± 57  | 1002 ± 1 | 57.3 ± 12.6                            | 4.9 ± 0.1                            | 53.6 ± 4.8                           | 20.9 ± 7.7                          | 0.8 ± 0.1              | 6.7 ± 2.6              | 64.0 ± 5.9                           |
|                               | SZ          | day          | 32.7 ± 0.4 | 50.8 ± 1.1 | 1.0 ± 0.2 | 644 ± 24  | 1006 ± 2 | 49.9 ± 14.8                            | 9.2 ± 0.5                            | 29.0 ± 2.6                           | 169 ± 30                            | 0.7 ± 0.1              | 3.6 ± 0.8              | 34.4 ± 3.2                           |
|                               |             | night        | 30.5 ± 0.5 | 61.3 ± 2.4 | 0.7 ± 0.3 | 107 ± 43  | 1006 ± 1 | 50.4 ± 16.5                            | 9.1 ± 0.3                            | 36.6 ± 4.0                           | 90.5 ± 21.8                         | 0.7 ± 0.1              | 2.6 ± 0.7              | 40.5 ± 4.6                           |
|                               | HG          | day          | 32.1 ± 0.4 | 54.6 ± 2.1 | 1.3 ± 0.1 | 647 ± 32  | 1008 ± 2 | 44.5 ± 19.8                            | 15.9 ± 15                            | 25.8 ± 2.1                           | 159 ± 20                            | 0.9 ± 0.1              | 3.5 ± 0.3              | 31.4 ± 2.3                           |
|                               |             | night        | 29.6 ± 0.6 | 69.7 ± 1.5 | 1.0 ± 0.1 | 182 ± 78  | 1007 ± 1 | 33.7 ± 15.2                            | 7.4 ± 0.7                            | 35.4 ± 5.2                           | 65.7 ± 18.0                         | 0.9 ± 0.1              | 3.3 ± 0.5              | 40.3 ± 5.9                           |
| Winter<br>(Mean±<br>95% C.I.) | XH          | day          | 17.6 ± 2.3 | 52.8 ± 4.7 | 1.2 ± 0.3 | 644 ± 98  | 1017 ± 3 | 35.2 ± 12.0                            | 12.1 ± 1.3                           | 39.3 ± 8.8                           | 77.0 ± 13.8                         | 0.9 ± 0.0              | 7.0 ± 4.3              | 49.8 ± 14.9                          |
|                               |             | night        | 15.4 ± 2.0 | 58.4 ± 5.3 | 1.4 ± 0.5 | 373 ± 173 | 1017 ± 3 | 35.0 ± 13.0                            | 11.0 ± 1.6                           | 54.8 ± 18.7                          | 39.9 ± 14.9                         | 1.0 ± 0.1              | 6.5 ± 4.0              | 64.4 ± 24.6                          |
|                               | SZ          | day          | 17.7 ± 2.4 | 47.7 ± 5.4 | 1.5 ± 0.5 | 633 ± 104 | 1016 ± 3 | 63.4 ± 15.2                            | 9.5 ± 1.0                            | 51.5 ± 10.4                          | 71.1 ± 19.8                         | 0.9 ± 0.1              | 11.1 ± 4.7             | 68.4 ± 15.3                          |
|                               |             | night        | 15.8 ± 2.0 | 51.2 ± 5.4 | 1.5 ± 0.6 | 372 ± 154 | 1017 ± 3 | 59.0 ± 16.2                            | 9.4 ± 1.1                            | 67.5 ± 20.7                          | 33.5 ± 13.3                         | 1.0 ± 0.1              | 19.9 ± 13.8            | 97.5 ± 40.3                          |
|                               | HKUST       | day          | 17.7 ± 2.0 | 51.1 ± 4.4 | 1.9 ± 0.3 | 541 ± 77  | 1016 ± 2 | 35.3 ± 10.9                            | 13.7 ± 2.2                           | 48.9 ± 10.4                          | 74.4 ± 22.6                         | 0.9 ± 0.1              | 10.3 ± 2.4             | 64.8 ± 13.4                          |
|                               |             | night        | 16.8 ± 1.8 | 56.9 ± 5   | 1.5 ± 0.4 | 271 ± 142 | 1015 ± 2 | 35.0 ± 10.5                            | 13.3 ± 2.1                           | 72.2 ± 23.4                          | 30.8 ± 13.3                         | 1.0 ± 0.1              | 15.1 ± 7.7             | 95.4 ± 33.4                          |

| Independent Samples Test |                             |                                         |      |                              |       |                 |                 |                       |                                           |          |  |  |  |  |
|--------------------------|-----------------------------|-----------------------------------------|------|------------------------------|-------|-----------------|-----------------|-----------------------|-------------------------------------------|----------|--|--|--|--|
| (a) XH                   |                             | Levene's Test for Equality of Variances |      | t Test for Equality of Means |       |                 |                 |                       |                                           |          |  |  |  |  |
|                          |                             | F                                       | Sig. | t                            | df    | Sig. (2-tailed) | Mean Difference | Std. Error Difference | 95% Confidence Interval of the Difference |          |  |  |  |  |
| Variable                 | Assumption                  |                                         |      |                              |       |                 |                 |                       | Lower                                     | Upper    |  |  |  |  |
| OC                       | Equal variances assumed     | 6.404                                   | .030 | -1.030                       | 10    | .327            | -1.02333        | .99364                | -3.23729                                  | 1.19063  |  |  |  |  |
|                          | Equal variances not assumed |                                         |      | -1.030                       | 6.625 | .339            | -1.02333        | .99364                | -3.40012                                  | 1.35346  |  |  |  |  |
| EC                       | Equal variances assumed     | .961                                    | .350 | -4.149                       | 10    | .002            | -.53000         | .12775                | -.81463                                   | -.24537  |  |  |  |  |
|                          | Equal variances not assumed |                                         |      | -4.149                       | 9.254 | .002            | -.53000         | .12775                | -.81778                                   | -.24222  |  |  |  |  |
| SOC                      | Equal variances assumed     | 3.115                                   | .108 | -.056                        | 10    | .956            | -.04833         | .85697                | -1.95777                                  | 1.86110  |  |  |  |  |
|                          | Equal variances not assumed |                                         |      | -.056                        | 7.379 | .957            | -.04833         | .85697                | -2.05384                                  | 1.95718  |  |  |  |  |
| absBrC405                | Equal variances assumed     | 4.818                                   | .053 | -3.363                       | 10    | .007            | -3.69333        | 1.09822               | -6.14032                                  | -1.24635 |  |  |  |  |
|                          | Equal variances not assumed |                                         |      | -3.363                       | 6.064 | .015            | -3.69333        | 1.09822               | -6.37371                                  | -1.01296 |  |  |  |  |
| absBC405                 | Equal variances assumed     | .010                                    | .922 | -3.507                       | 10    | .006            | -8.00333        | 2.28196               | -13.08785                                 | -2.91881 |  |  |  |  |
|                          | Equal variances not assumed |                                         |      | -3.507                       | 9.920 | .006            | -8.00333        | 2.28196               | -13.09341                                 | -2.91326 |  |  |  |  |
| MACBrC405                | Equal variances assumed     | 5.562                                   | .040 | -3.663                       | 10    | .004            | -.45167         | .12329                | -.72638                                   | -.17696  |  |  |  |  |
|                          | Equal variances not assumed |                                         |      | -3.663                       | 6.132 | .010            | -.45167         | .12329                | -.75178                                   | -.15156  |  |  |  |  |
| MACBC635                 | Equal variances assumed     | 4.450                                   | .061 | -1.486                       | 10    | .168            | -1.60167        | 1.07784               | -4.00324                                  | .79991   |  |  |  |  |
|                          | Equal variances not assumed |                                         |      | -1.486                       | 7.944 | .176            | -1.60167        | 1.07784               | -4.09022                                  | .88689   |  |  |  |  |

| Independent Samples Test |                             |                                         |      |                              |       |                 |                 |                       |                                           |         |  |  |  |  |
|--------------------------|-----------------------------|-----------------------------------------|------|------------------------------|-------|-----------------|-----------------|-----------------------|-------------------------------------------|---------|--|--|--|--|
| (b) JL                   |                             | Levene's Test for Equality of Variances |      | t Test for Equality of Means |       |                 |                 |                       |                                           |         |  |  |  |  |
|                          |                             | F                                       | Sig. | t                            | df    | Sig. (2-tailed) | Mean Difference | Std. Error Difference | 95% Confidence Interval of the Difference |         |  |  |  |  |
| Variable                 | Assumption                  |                                         |      |                              |       |                 |                 |                       | Lower                                     | Upper   |  |  |  |  |
| OC                       | Equal variances assumed     | .043                                    | .841 | -1.130                       | 8     | .291            | -1.37000        | 1.21257               | -4.16619                                  | 1.42619 |  |  |  |  |
|                          | Equal variances not assumed |                                         |      | -1.130                       | 7.843 | .292            | -1.37000        | 1.21257               | -4.17598                                  | 1.43598 |  |  |  |  |
| EC                       | Equal variances assumed     | .601                                    | .461 | -.841                        | 8     | .425            | -1.42000        | .16877                | -.53119                                   | .24719  |  |  |  |  |
|                          | Equal variances not assumed |                                         |      | -.841                        | 7.586 | .426            | -1.42000        | .16877                | -.53492                                   | .25092  |  |  |  |  |
| SOC                      | Equal variances assumed     | .262                                    | .622 | -.957                        | 8     | .366            | -1.11200        | 1.16138               | -3.79014                                  | 1.56614 |  |  |  |  |
|                          | Equal variances not assumed |                                         |      | -.957                        | 7.516 | .368            | -1.11200        | 1.16138               | -3.82049                                  | 1.59649 |  |  |  |  |
| absBrC405                | Equal variances assumed     | 1.279                                   | .291 | -2.169                       | 8     | .062            | -5.33000        | 2.45790               | -10.99792                                 | .33792  |  |  |  |  |
|                          | Equal variances not assumed |                                         |      | -2.169                       | 5.368 | .079            | -5.33000        | 2.45790               | -11.52019                                 | .86019  |  |  |  |  |
| absBC405                 | Equal variances assumed     | 3.561                                   | .096 | -1.505                       | 8     | .171            | -6.53600        | 4.34162               | -16.54780                                 | 3.47580 |  |  |  |  |
|                          | Equal variances not assumed |                                         |      | -1.505                       | 6.510 | .179            | -6.53600        | 4.34162               | -16.96091                                 | 3.88891 |  |  |  |  |
| MACBrC405                | Equal variances assumed     | .373                                    | .558 | -1.606                       | 8     | .147            | -.41000         | .25529                | -.99870                                   | .17870  |  |  |  |  |
|                          | Equal variances not assumed |                                         |      | -1.606                       | 7.331 | .150            | -.41000         | .25529                | -1.00817                                  | .18817  |  |  |  |  |
| MACBC635                 | Equal variances assumed     | 2.118                                   | .184 | -2.047                       | 8     | .075            | -2.36400        | 1.15482               | -5.02702                                  | .29902  |  |  |  |  |
|                          | Equal variances not assumed |                                         |      | -2.047                       | 6.911 | .080            | -2.36400        | 1.15482               | -5.10187                                  | .37387  |  |  |  |  |

| Independent Samples Test |                             |                                         |      |                              |       |                 |                 |                       |                                           |         |  |  |  |  |
|--------------------------|-----------------------------|-----------------------------------------|------|------------------------------|-------|-----------------|-----------------|-----------------------|-------------------------------------------|---------|--|--|--|--|
| (c) SZ                   |                             | Levene's Test for Equality of Variances |      | t Test for Equality of Means |       |                 |                 |                       |                                           |         |  |  |  |  |
|                          |                             | F                                       | Sig. | t                            | df    | Sig. (2-tailed) | Mean Difference | Std. Error Difference | 95% Confidence Interval of the Difference |         |  |  |  |  |
| Variable                 | Assumption                  |                                         |      |                              |       |                 |                 |                       | Lower                                     | Upper   |  |  |  |  |
| OC                       | Equal variances assumed     | .405                                    | .539 | .352                         | 10    | .732            | .44167          | 1.25343               | -2.35115                                  | 3.23448 |  |  |  |  |
|                          | Equal variances not assumed |                                         |      | .352                         | 9.465 | .732            | .44167          | 1.25343               | -2.37271                                  | 3.25605 |  |  |  |  |
| EC                       | Equal variances assumed     | .595                                    | .458 | -.410                        | 10    | .691            | -.07500         | .18312                | -.48302                                   | .33302  |  |  |  |  |
|                          | Equal variances not assumed |                                         |      | -.410                        | 9.192 | .692            | -.07500         | .18312                | -.48794                                   | .33794  |  |  |  |  |
| SOC                      | Equal variances assumed     | .102                                    | .756 | .602                         | 10    | .561            | .57167          | .94945                | -1.54384                                  | 2.68717 |  |  |  |  |
|                          | Equal variances not assumed |                                         |      | .602                         | 9.768 | .561            | .57167          | .94945                | -1.55066                                  | 2.69399 |  |  |  |  |
| absBrC405                | Equal variances assumed     | 1.036                                   | .333 | -1.283                       | 10    | .228            | -.89667         | .69897                | -2.45406                                  | .66073  |  |  |  |  |
|                          | Equal variances not assumed |                                         |      | -1.283                       | 8.437 | .234            | -.89667         | .69897                | -2.49408                                  | .70075  |  |  |  |  |
| absBC405                 | Equal variances assumed     | 1.470                                   | .253 | -.675                        | 10    | .515            | -2.39500        | 3.54934               | -10.30342                                 | 5.51342 |  |  |  |  |
|                          | Equal variances not assumed |                                         |      | -.675                        | 8.786 | .517            | -2.39500        | 3.54934               | -10.45410                                 | 5.66410 |  |  |  |  |
| MACBrC405                | Equal variances assumed     | .010                                    | .923 | -1.093                       | 10    | .300            | -1.12500        | .11439                | -.37988                                   | .12988  |  |  |  |  |
|                          | Equal variances not assumed |                                         |      | -1.093                       | 9.930 | .300            | -1.12500        | .11439                | -.38012                                   | .13012  |  |  |  |  |
| MACBC635                 | Equal variances assumed     | 2.950                                   | .117 | -.552                        | 10    | .593            | -.57667         | 1.04535               | -2.90585                                  | 1.75252 |  |  |  |  |
|                          | Equal variances not assumed |                                         |      | -.552                        | 7.019 | .598            | -.57667         | 1.04535               | -3.04714                                  | 1.89381 |  |  |  |  |

| Independent Samples Test |                             |                                         |      |                              |       |                 |                 |                       |                                           |         |  |  |  |  |
|--------------------------|-----------------------------|-----------------------------------------|------|------------------------------|-------|-----------------|-----------------|-----------------------|-------------------------------------------|---------|--|--|--|--|
| (d) HG                   |                             | Levene's Test for Equality of Variances |      | t Test for Equality of Means |       |                 |                 |                       |                                           |         |  |  |  |  |
|                          |                             | F                                       | Sig. | t                            | df    | Sig. (2-tailed) | Mean Difference | Std. Error Difference | 95% Confidence Interval of the Difference |         |  |  |  |  |
| Variable                 | Assumption                  |                                         |      |                              |       |                 |                 |                       | Lower                                     | Upper   |  |  |  |  |
| OC                       | Equal variances assumed     | .480                                    | .504 | 1.880                        | 10    | .090            | 1.89000         | 1.00544               | -.35026                                   | 4.13026 |  |  |  |  |
|                          | Equal variances not assumed |                                         |      | 1.880                        | 8.105 | .096            | 1.89000         | 1.00544               | -.42332                                   | 4.20332 |  |  |  |  |
| EC                       | Equal variances assumed     | .086                                    | .776 | .176                         | 10    | .864            | .03333          | .18906                | -.38793                                   | .45460  |  |  |  |  |
|                          | Equal variances not assumed |                                         |      | .176                         | 9.863 | .864            | .03333          | .18906                | -.38872                                   | .45539  |  |  |  |  |
| SOC                      | Equal variances assumed     | .912                                    | .362 | 2.618                        | 10    | .026            | 1.83833         | .70223                | .27366                                    | 3.40300 |  |  |  |  |
|                          | Equal variances not assumed |                                         |      | 2.618                        | 7.492 | .033            | 1.83833         | .70223                | .19966                                    | 3.47701 |  |  |  |  |
| absBrC405                | Equal variances assumed     | 1.106                                   | .318 | 1.319                        | 10    | .216            | 1.16000         | .87924                | -.79906                                   | 3.11906 |  |  |  |  |
|                          | Equal variances not assumed |                                         |      | 1.319                        | 9.435 | .218            | 1.16000         | .87924                | -.81507                                   | 3.13507 |  |  |  |  |
| absBC405                 | Equal variances assumed     | .199                                    | .665 | -.627                        | 10    | .545            | -1.54500        | 2.46382               | -7.03473                                  | 3.94473 |  |  |  |  |
|                          | Equal variances not assumed |                                         |      | -.627                        | 9.691 | .545            | -1.54500        | 2.46382               | -7.05858                                  | 3.96858 |  |  |  |  |
| MACBrC405                | Equal variances assumed     | .290                                    | .602 | .537                         | 10    | .603            | .07667          | .14287                | -.24166                                   | .39500  |  |  |  |  |
|                          | Equal variances not assumed |                                         |      | .537                         | 9.890 | .603            | .07667          | .14287                | -.24214                                   | .39547  |  |  |  |  |
| MACBC635                 | Equal variances assumed     | .462                                    | .512 | -.785                        | 10    | .450            | -2.80167        | 3.31241               | -9.98218                                  | 4.77885 |  |  |  |  |
|                          | Equal variances not assumed |                                         |      | -.785                        | 9.205 | .452            | -2.80167        | 3.31241               | -10.06952                                 | 4.86619 |  |  |  |  |

**Figure S1.** Results of independent samples t-test using IBM SPSS Statistics 26 for day/night average value comparisons of OC, EC, and SOC concentrations, babs,BrC<sub>405</sub>, babs,BC<sub>405</sub>, MACBrC<sub>405</sub> and MACBC<sub>635</sub> at the four sites in autumn ( $p < 0.05$  indicates a significant difference, same below).

| Independent Samples Test                |       |      |        |    |                              |                 |                       |                                           |         |  |
|-----------------------------------------|-------|------|--------|----|------------------------------|-----------------|-----------------------|-------------------------------------------|---------|--|
| Levene's Test for Equality of Variances |       |      |        |    | t-test for Equality of Means |                 |                       |                                           |         |  |
|                                         | F     | Sig. | t      | df | Sig. (2-tailed)              | Mean Difference | Std. Error Difference | 95% Confidence Interval of the Difference |         |  |
|                                         |       |      |        |    |                              |                 |                       | Lower                                     | Upper   |  |
| (a) XH                                  |       |      |        |    |                              |                 |                       |                                           |         |  |
| OC                                      | 1.102 | .306 | -.501  | 21 | .622                         | -.98295         | 1.96159               | -5.08230                                  | 3.09639 |  |
| EC                                      | 8.649 | .008 | -.857  | 21 | .401                         | -.33288         | .38841                | -1.14062                                  | .47486  |  |
| SOC                                     | .007  | .933 | -.273  | 21 | .787                         | -.36091         | 1.32114               | -3.10837                                  | 2.38655 |  |
| absBrC405                               | .861  | .364 | -.481  | 21 | .636                         | -1.37508        | 2.85943               | -7.32159                                  | 4.57144 |  |
| absBC405                                | 6.891 | .016 | -.273  | 21 | .370                         | -5.26515        | 5.74988               | -17.22269                                 | 6.69238 |  |
| MACBrC405                               | .016  | .900 | .018   | 21 | .986                         | .00280          | .15833                | -.32647                                   | .33207  |  |
| MACBC635                                | .036  | .851 | -.045  | 21 | .964                         | -.17886         | 3.91830               | -8.33923                                  | 7.98150 |  |
| (b) SZ                                  |       |      |        |    |                              |                 |                       |                                           |         |  |
| OC                                      | 2.961 | .099 | -.484  | 22 | .633                         | -.95750         | 1.97769               | -5.08679                                  | 3.14398 |  |
| EC                                      | 9.742 | .005 | -1.382 | 22 | .181                         | -.48593         | .35144                | -1.21468                                  | .24301  |  |
| SOC                                     | .627  | .437 | -.037  | 22 | .971                         | -.05083         | 1.38438               | -2.92185                                  | 2.82019 |  |
| absBrC405                               | 7.797 | .011 | 1.228  | 22 | .232                         | 1.79833         | 1.46397               | -1.23776                                  | 4.83443 |  |
| absBC405                                | 9.507 | .005 | -1.210 | 22 | .239                         | -9.59583        | 7.92854               | -26.03861                                 | 6.84695 |  |
| MACBrC405                               | 3.226 | .086 | 1.240  | 22 | .228                         | .24833          | .20026                | -1.6697                                   | .66364  |  |
| MACBC635                                | .269  | .652 | .497   | 22 | .624                         | .64250          | 1.29392               | -2.04092                                  | 3.32592 |  |
| (c) HKUST                               |       |      |        |    |                              |                 |                       |                                           |         |  |
| OC                                      | .203  | .658 | -.256  | 16 | .802                         | -.40889         | 1.60031               | -3.80139                                  | 2.98361 |  |
| EC                                      | 1.665 | .215 | -1.239 | 16 | .233                         | -.35000         | .28238                | -.94861                                   | .24861  |  |
| SOC                                     | .004  | .952 | .217   | 16 | .831                         | .24556          | 1.12921               | -2.14825                                  | 2.69337 |  |
| absBrC405                               | 4.731 | .045 | -.782  | 16 | .445                         | -1.57333        | 2.01082               | -5.83608                                  | 2.68941 |  |
| absBC405                                | .544  | .472 | -1.159 | 16 | .263                         | -8.00667        | 6.90641               | -22.64761                                 | 6.63428 |  |
| MACBrC405                               | 1.440 | .248 | -.264  | 16 | .795                         | -.04222         | .15963                | -.38063                                   | .29619  |  |
| MACBC635                                | .302  | .590 | -.944  | 16 | .359                         | -1.42000        | 1.50420               | -4.60875                                  | 1.76875 |  |

**Figure S2.** Results of independent samples t-test for day/night average value comparisons of OC, EC, and SOC concentrations,  $\text{babs}_{\text{BrC}405}$ ,  $\text{babs}_{\text{BC}405}$ ,  $\text{MAC}_{\text{BrC}405}$ , and  $\text{MAC}_{\text{BC}635}$  at the three sites in winter.

Since the variables at some sites do not conform to a normal distribution, we performed a nonparametric test for these variables again below (Figure S3 and Figure S4).

| (a) HG- $\text{MAC}_{\text{BC}635}$             |        | (b) JL- $\text{MAC}_{\text{BrC}405}$            |        |
|-------------------------------------------------|--------|-------------------------------------------------|--------|
| Independent-Samples Mann-Whitney U Test Summary |        | Independent-Samples Mann-Whitney U Test Summary |        |
| Total N                                         | 12     | Total N                                         | 10     |
| Mann-Whitney U                                  | 22.000 | Mann-Whitney U                                  | 21.000 |
| Wilcoxon W                                      | 43.000 | Wilcoxon W                                      | 36.000 |
| Test Statistic                                  | 22.000 | Test Statistic                                  | 21.000 |
| Standard Error                                  | 6.234  | Standard Error                                  | 4.787  |
| Standardized Test Statistic                     | .642   | Standardized Test Statistic                     | 1.776  |
| Asymptotic Sig.(2-sided test)                   | .521   | Asymptotic Sig.(2-sided test)                   | .076   |
| Exact Sig.(2-sided test)                        | .589   | Exact Sig.(2-sided test)                        | .095   |

**Figure S3.** Results of the independent samples Mann–Whitney U test for diurnal data of the corresponding variables for (a) HG and (b) JL in autumn.

| (a) XH-EC                                       |         | (b) XH- $b_{abs,BC,405}$                        |         | (c) XH- $MAC_{BC,635}$                          |         |
|-------------------------------------------------|---------|-------------------------------------------------|---------|-------------------------------------------------|---------|
| Independent-Samples Mann-Whitney U Test Summary |         | Independent-Samples Mann-Whitney U Test Summary |         | Independent-Samples Mann-Whitney U Test Summary |         |
| Total N                                         | 23      | Total N                                         | 23      | Total N                                         | 23      |
| Mann-Whitney U                                  | 71.000  | Mann-Whitney U                                  | 69.000  | Mann-Whitney U                                  | 69.000  |
| Wilcoxon W                                      | 137.000 | Wilcoxon W                                      | 135.000 | Wilcoxon W                                      | 135.000 |
| Test Statistic                                  | 71.000  | Test Statistic                                  | 69.000  | Test Statistic                                  | 69.000  |
| Standard Error                                  | 16.236  | Standard Error                                  | 16.248  | Standard Error                                  | 16.248  |
| Standardized Test Statistic                     | .308    | Standardized Test Statistic                     | .185    | Standardized Test Statistic                     | .185    |
| Asymptotic Sig. (2-sided test)                  | .758    | Asymptotic Sig. (2-sided test)                  | .854    | Asymptotic Sig. (2-sided test)                  | .854    |
| Exact Sig. (2-sided test)                       | .786    | Exact Sig. (2-sided test)                       | .880    | Exact Sig. (2-sided test)                       | .880    |

  

| (d) SZ- $b_{abs,BC,405}$                        |         | (e) HKUST- $b_{abs,BC,405}$                     |        | (f) HKUST- $MAC_{BC,635}$                       |        |
|-------------------------------------------------|---------|-------------------------------------------------|--------|-------------------------------------------------|--------|
| Independent-Samples Mann-Whitney U Test Summary |         | Independent-Samples Mann-Whitney U Test Summary |        | Independent-Samples Mann-Whitney U Test Summary |        |
| Total N                                         | 24      | Total N                                         | 18     | Total N                                         | 18     |
| Mann-Whitney U                                  | 77.000  | Mann-Whitney U                                  | 51.000 | Mann-Whitney U                                  | 53.000 |
| Wilcoxon W                                      | 155.000 | Wilcoxon W                                      | 96.000 | Wilcoxon W                                      | 98.000 |
| Test Statistic                                  | 77.000  | Test Statistic                                  | 51.000 | Test Statistic                                  | 53.000 |
| Standard Error                                  | 17.321  | Standard Error                                  | 11.325 | Standard Error                                  | 11.325 |
| Standardized Test Statistic                     | .289    | Standardized Test Statistic                     | .927   | Standardized Test Statistic                     | 1.104  |
| Asymptotic Sig. (2-sided test)                  | .773    | Asymptotic Sig. (2-sided test)                  | .354   | Asymptotic Sig. (2-sided test)                  | .270   |
| Exact Sig. (2-sided test)                       | .799    | Exact Sig. (2-sided test)                       | .387   | Exact Sig. (2-sided test)                       | .297   |

**Figure S4.** Results of the independent samples Mann–Whitney U test for the diurnal data of the corresponding variables for XH, SZ, and HKUST in winter.

Since the significance differences of some variables were relatively uncertain, we subjected these variables to one-sided independent sample *t*-tests (Figure S5).

| one-tailed independent samples t-test |                                               |                   |             |         |         |
|---------------------------------------|-----------------------------------------------|-------------------|-------------|---------|---------|
| Object                                | Equal Variance                                | Hypothesis        | t Statistic | DF      | Prob<t  |
| JL- $b_{abs,BrC,405}$                 | Equal Variance Assumed                        | daytime<nighttime | -2.16911    | 8       | 0.03095 |
|                                       | Equal Variance NOT Assumed (Welch Correction) | daytime<nighttime | -2.16911    | 5.36831 | 0.03925 |
| JL- $MAC_{BC,635}$                    | Equal Variance Assumed                        | daytime<nighttime | -2.04576    | 8       | 0.0375  |
|                                       | Equal Variance NOT Assumed (Welch Correction) | daytime<nighttime | -2.04576    | 6.91224 | 0.04027 |
| HG-OC                                 | Equal Variance Assumed                        | daytime>nighttime | 1.88413     | 10      | 0.04446 |
|                                       | Equal Variance NOT Assumed (Welch Correction) | daytime>nighttime | 1.88413     | 8.11661 | 0.04788 |

  

| one-tailed Mann-Whitney U test |                   |   |          |              |                    |
|--------------------------------|-------------------|---|----------|--------------|--------------------|
| Object                         | Hypothesis        | U | Z        | Exact Prob<U | Asympptotic Prob<U |
| JL- $MAC_{BrC,405}$            | daytime<nighttime | 4 | -1.67115 | 0.04762      | 0.04735            |

**Figure S5.** Results of the one-sided independent sample *t*-test or Mann–Whitney U test using Origin 2023 for day–night average value comparisons of the corresponding variables of JL and HG in autumn.

In summary (Figures S1 - S5), variables with significant diurnal differences in autumn at  $p < 0.05$  (95% confidence interval) were XH: EC,  $b_{abs,BrC,405}$ ,  $b_{abs,BC,405}$  and  $MAC_{BrC,405}$ ; JL:  $b_{abs,BrC,405}$ ,  $MAC_{BrC,405}$  and  $MAC_{BC,635}$ ; HG: OC and SOC. No significant differences were found in winter.

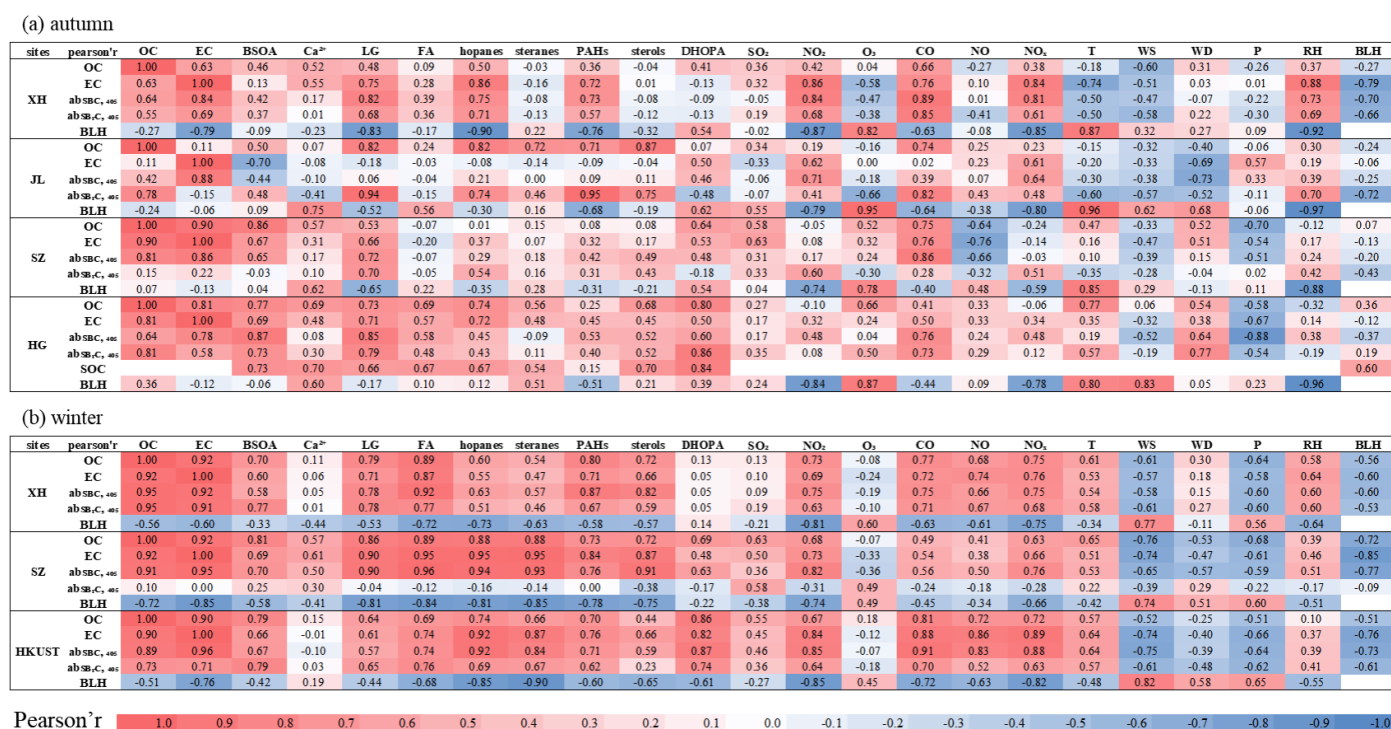

**Figure S6.** Pearson correlation coefficients of OC, EC, SOC concentrations,  $b_{abs,BrC,405}$  and  $b_{abs,BC,405}$  with source tracers including BSOA, Ca<sup>2+</sup>, levoglucosan (LG), fatty acids (FA), hopanes, steranes, HMW-PAHs (PAHs), sterols and DHOPA, and gaseous pollutants including SO<sub>2</sub>, NO<sub>2</sub>, O<sub>3</sub>, NO and NO<sub>x</sub> and meteorological parameters including temperature (T), relative humidity (RH), wind speed (WS), atmospheric pressure (P) and boundary layer height (BLH).

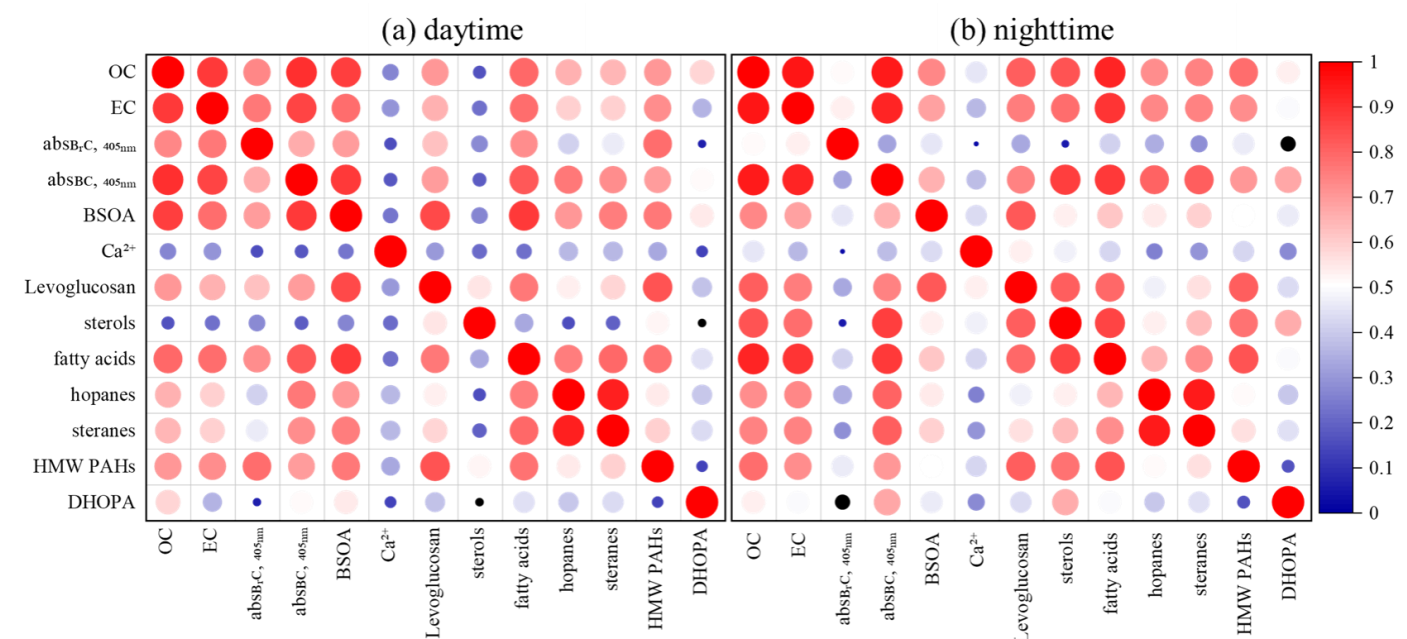

**Figure S7.** Pearson correlation coefficients between OC, EC,  $b_{abs,BrC,405}$ ,  $b_{abs,BC,405}$ , and source marker using (a) daytime data and (b) nighttime data in winter, respectively.



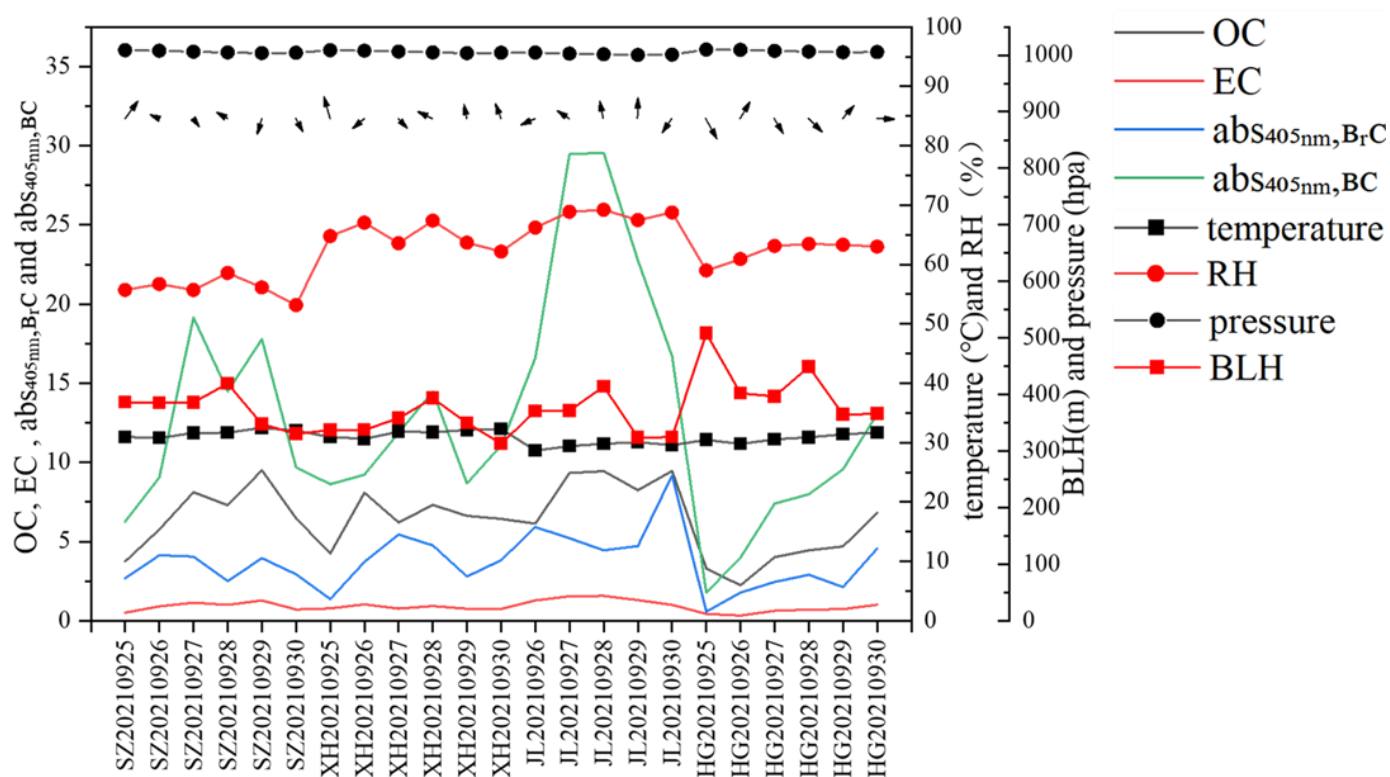

**Figure S8.** Day-to-day variation in PM<sub>2.5</sub> carbonaceous aerosol concentration ( $\mu\text{g}/\text{m}^3$ ) and their light-absorbing properties ( $\text{Mm}^{-1}$ ), as well as meteorological factors during the observing period in autumn. Vector arrows indicate wind velocity and direction.



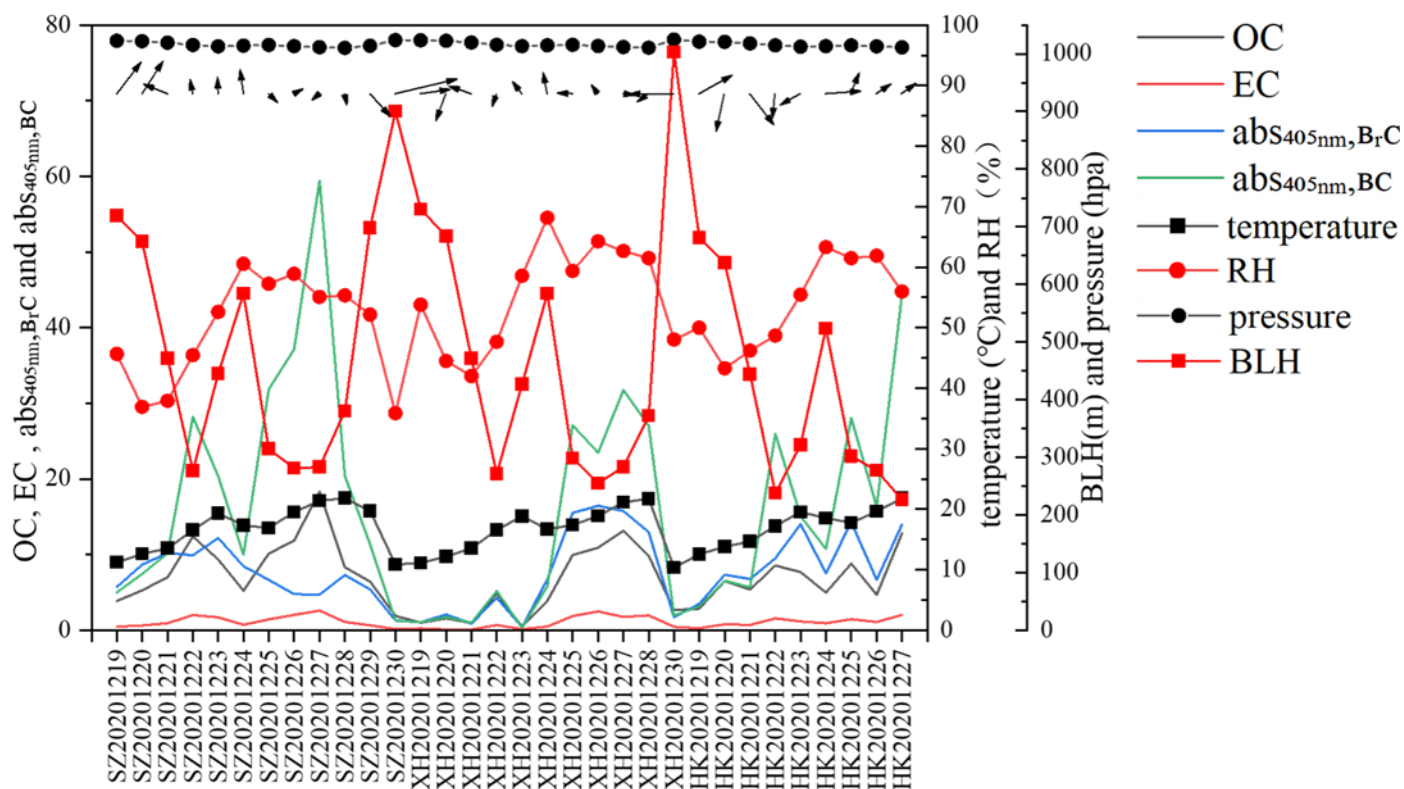

**Figure S9.** Day-to-day variation in PM<sub>2.5</sub> carbonaceous aerosol concentration ( $\mu\text{g}/\text{m}^3$ ) and their light-absorbing properties ( $\text{Mm}^{-1}$ ), as well as meteorological factors during the observing period in winter.
